# Supplementary material for: Marked effects of novel selective peroxisome proliferator-activated receptor α modulator, pemafibrate in severe hypertriglyceridemia: preliminary report
Source: Springer Nature journal article supplement (doi:10.1186/s12933-020-01172-8), 2020-11-27
Supplement: MOESM1 [file 18635020]

**Additional Table S1. Changes of Serum Lipids, Liver Function/Renal Function Tests before and after Treatment with Pemaifibrate.**

**A Patient 1**

| <b>treatment day</b> | <b>TG</b> | <b>HDL-C</b> | <b>LDL-C</b> | <b>blood glucose</b> | <b>HbA1c</b> | <b>AST</b> | <b>ALT</b> | <b>γGTP</b> | <b>ALP</b> | <b>CK</b> | <b>Cre</b> | <b>dose of pemaifibrate</b> |
|----------------------|-----------|--------------|--------------|----------------------|--------------|------------|------------|-------------|------------|-----------|------------|-----------------------------|
| day                  | mg/dL     | mg/dL        | mg/dL        | mg/dL                | %            | IU/L       | IU/L       | IU/L        | IU/L       | IU/L      | mg/dL      | mg/day                      |
| -139                 | 2511      |              |              |                      |              |            |            |             |            |           |            |                             |
| -91                  | 932       | 24           | 41           | 95                   |              | 16         | 11         | 19          |            |           | 0.6        |                             |
| -77                  | 1446      | 21           | 36           |                      |              | 13         | 8          | 18          |            |           |            |                             |
| 0                    | 1326      | 24           | 41           |                      |              | 15         | 12         | 27          |            |           |            | 0.4                         |
| 35                   | 173       | 33           | 103          |                      |              |            |            |             |            |           |            | 0.4                         |
| 98                   | 815       | 25           | 46           | 87                   |              | 18         | 10         | 22          |            | 46        | 0.65       |                             |
| 189                  | 165       | 39           | 121          | 94                   |              | 17         | 12         | 18          |            | 51        | 0.62       | 0.4                         |
| 280                  | 164       | 42           | 125          | 88                   |              | 21         | 16         | 21          |            | 54        | 0.6        | 0.4                         |

**B Patient 2**

| <b>treatment day</b> | <b>TG</b> | <b>HDL-C</b> | <b>LDL-C</b> | <b>blood glucose</b> | <b>HbA1c</b> | <b>AST</b> | <b>ALT</b> | <b>γGTP</b> | <b>ALP</b> | <b>CK</b> | <b>Cre</b> | <b>dose of pemaifibrate</b> |
|----------------------|-----------|--------------|--------------|----------------------|--------------|------------|------------|-------------|------------|-----------|------------|-----------------------------|
| day                  | mg/dL     | mg/dL        | mg/dL        | mg/dL                | %            | IU/L       | IU/L       | IU/L        | IU/L       | IU/L      | mg/dL      | mg/day                      |
| -7                   | 2725      | 24           | 62           |                      |              |            |            |             |            |           |            |                             |
| -21                  | 392       | 33           | 146          |                      |              | 21         | 14         | 34          | 209        | 247       | 0.82       | 0.4                         |
| 0                    | 2040      | 28           | 60           |                      |              |            |            |             |            |           |            | 0.4                         |
| 50                   | 392       | 35           | 141          |                      |              | 29         | 21         | 26          | 155        | 123       | 0.85       | 0.4                         |
| 91                   | 119       | 43           | 151          | 68                   |              | 21         | 16         | 24          | 179        | 105       | 0.87       | 0.4                         |
| 210                  | 959       | 27           | 82           | 88                   |              | 23         | 21         | 35          | 199        | 77        | 0.86       | 0.2                         |
| 301                  | 2837      | 28           | 70           | 108                  |              | 29         | 27         | 54          | 224        | 117       | 0.77       |                             |
| 336                  | 759       | 30           | 93           |                      |              | 25         | 27         | 37          | 161        | 201       | 0.75       | 0.2                         |
| 403                  | 234       | 39           | 168          |                      |              | 28         | 30         | 36          | 152        | 111       | 0.86       | 0.2                         |

**C Patient 3**

| <b>treatment day</b> | <b>TG</b> | <b>HDL-C</b> | <b>LDL-C</b> | <b>blood glucose</b> | <b>HbA1c</b> | <b>AST</b> | <b>ALT</b> | <b>γGTP</b> | <b>ALP</b> | <b>CK</b> | <b>Cre</b> | <b>dose of pemafibrate</b> |
|----------------------|-----------|--------------|--------------|----------------------|--------------|------------|------------|-------------|------------|-----------|------------|----------------------------|
| day                  | mg/dL     | mg/dL        | mg/dL        | mg/dL                | %            | IU/L       | IU/L       | IU/L        | IU/L       | IU/L      | mg/dL      | mg/day                     |
| -177                 | 2300      | 39           | 120          | 239                  | 12.1         | 21         | 30         | 76          | 360        | 259       | 0.7        |                            |
| -51                  | 2700      | 37           | 100          | 180                  | 9            |            |            |             |            |           |            |                            |
| 0                    | 2300      | 39           | 110          | 178                  | 8.1          | 47         | 56         | 146         | 316        | 247       | 0.78       | 0.1                        |
| 27                   | 780       | 39           | 149          | 123                  | 7.9          |            |            |             |            |           |            | 0.1                        |
| 61                   | 298       | 60           | 248          | 128                  | 7.3          | 17         | 15         | 43          | 184        | 112       | 0.54       | 0.1                        |
| 201                  | 330       | 65           | 152          | 118                  | 7.9          | 22         | 24         | 80          | 202        | 165       | 0.76       | 0.2                        |
| 227                  | 400       | 60           | 134          |                      |              |            |            |             |            |           |            | 0.2                        |
| 244                  | 505       | 56           | 139          | 153                  | 7.7          |            |            |             |            |           |            | 0.2                        |
| 279                  | 434       | 59           | 121          | 159                  | 7.9          |            |            |             |            |           |            | 0.2                        |
| 320                  | 349       | 66           | 175          | 124                  | 7.9          |            |            |             |            |           |            | 0.2                        |
| 404                  | 127       | 67           | 127          | 98                   | 7.7          | 17         | 13         | 35          | 193        | 138       | 0.87       | 0.2                        |
